# Supplementary material for: Multiple growth of zirconolite in marble (Mogok metamorphic belt, Myanmar): evidence for episodes of fluid metasomatism and Zr–Ti–U mineralization in metacarbonate systems
Source: Copernicus journal article supplement (doi:10.5194/ejm-36-11-2024), 2024-01-05
Supplement: Supplementary file 1 [file ejm-36-11-2024-supplement.pdf]

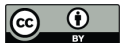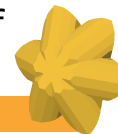

*Supplement of*

**Multiple growth of zirconolite in marble (Mogok metamorphic belt, Myanmar): evidence for episodes of fluid metasomatism and Zr–Ti–U mineralization in metacarbonate systems**

**Qian Guo et al.**

*Correspondence to:* Shun Guo ([guoshun@mail.iggcas.ac.cn](mailto:guoshun@mail.iggcas.ac.cn))

The copyright of individual parts of the supplement might differ from the article licence.

## Supplement materials

**Figure S1.** Plots of Nb<sub>2</sub>O<sub>5</sub> (a), HfO<sub>2</sub> (b), MgO (c), FeO (d), Al<sub>2</sub>O<sub>3</sub>(e), and ThO<sub>2</sub>(f) with bars (data measured by EMPA) to discriminate Zrl-III from Zrl-I and Zrl-II.

**Figure S2.** Images of representative LA-ICP-MS analysis pits. Small pits (16 μm) and big pits (32 μm) were for dating and trace elements analyses, respectively. The numbers represent the <sup>207</sup>Pb-corrected <sup>206</sup>Pb/<sup>238</sup>U ages (Ma) or the Hf composition (ppm).

**Table S1.** Representative major and minor element compositions (wt%) of baddeleyite, rutile, geikielite, spinel, forsterite, and phlogopite.

**Table S2.** U–Pb data for different types of zirconolites from the MMB.

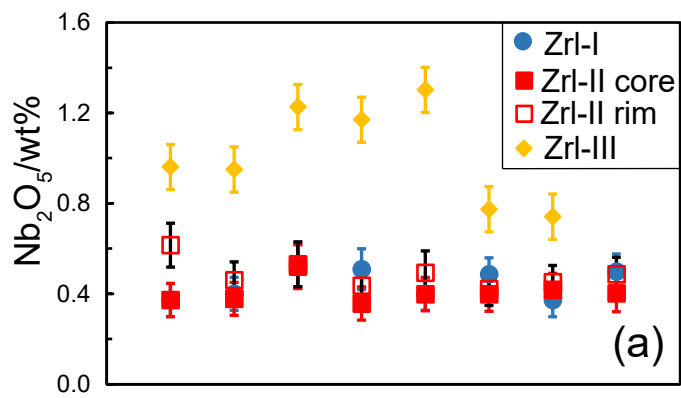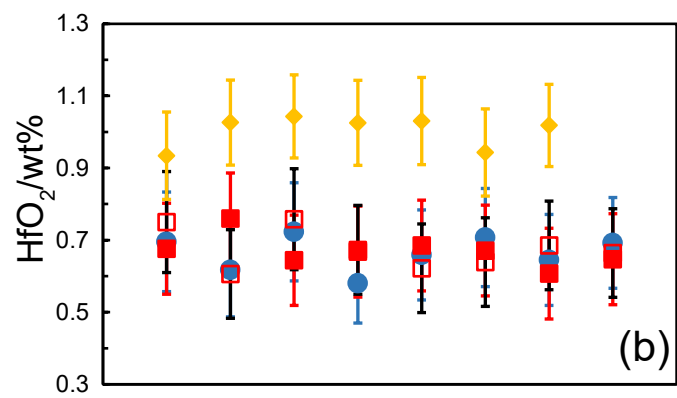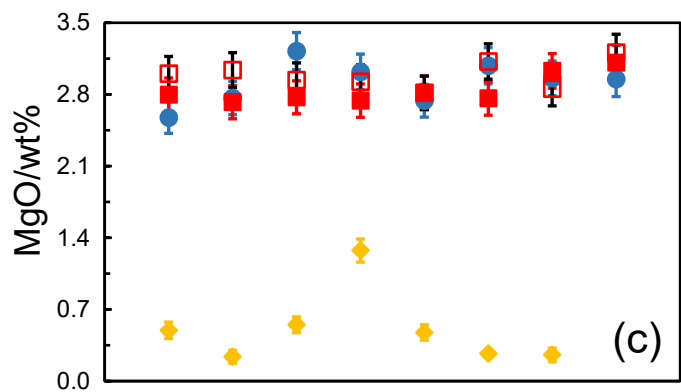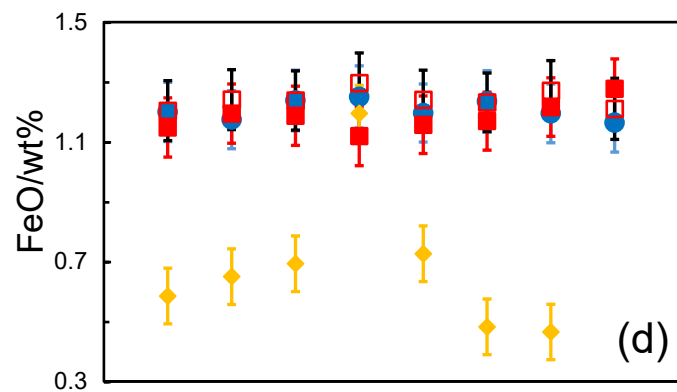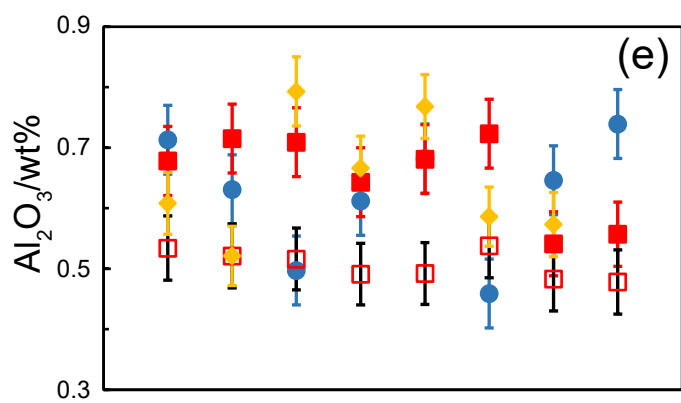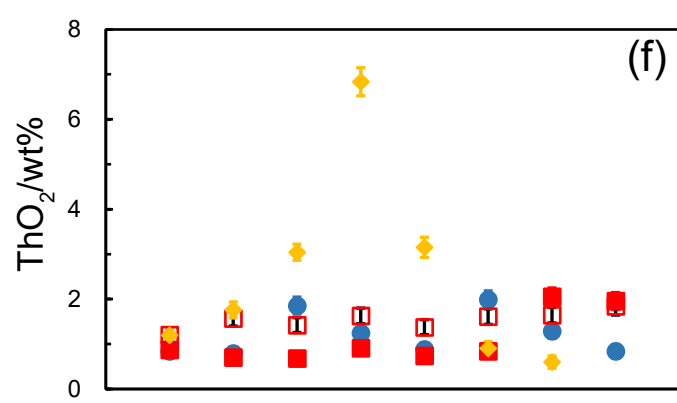

Figure S1

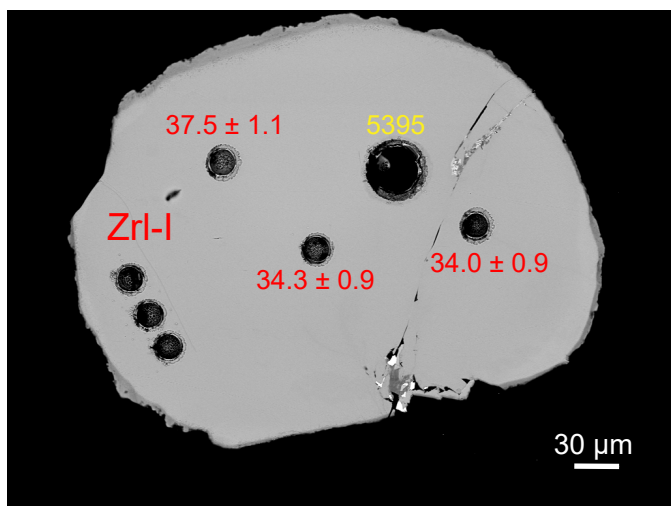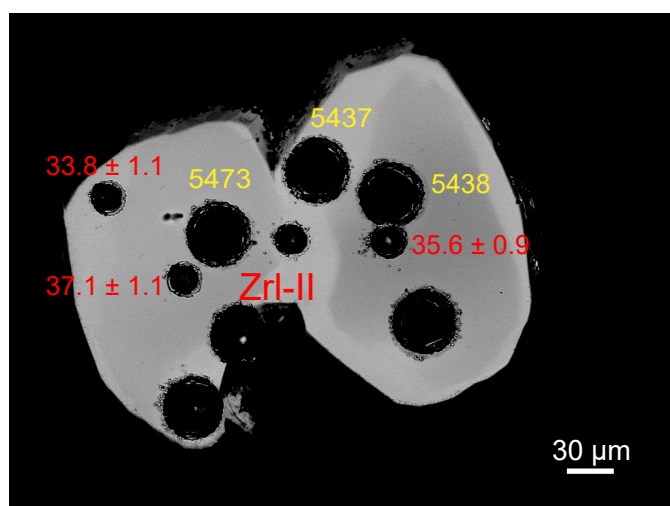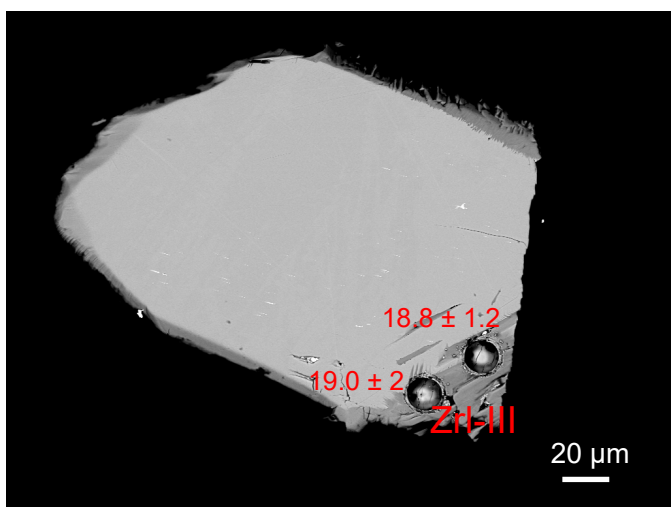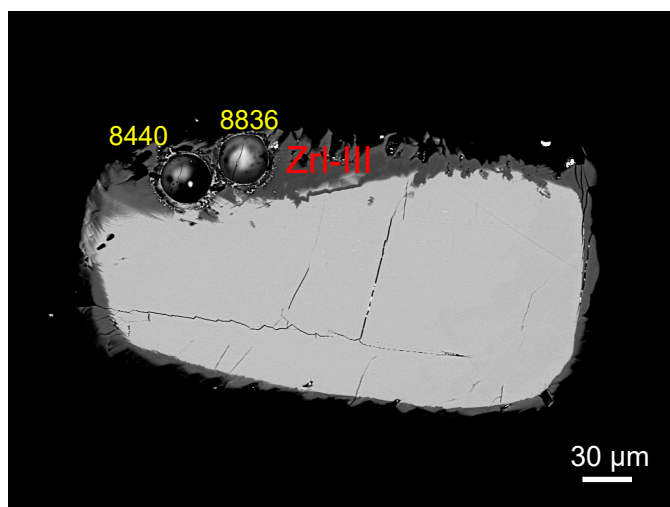

Figure S2

**Table S1. Representative major and minor element compositions (wt%) of baddeleyite, rutile, geikielite, spinel, forsterite, and phlogopite.**

*Baddeleyite composition*

| Sample                             | 13MDL76-A |       |       | 13MDL76-B |       |       |
|------------------------------------|-----------|-------|-------|-----------|-------|-------|
|                                    |           |       |       |           |       |       |
| <b>UO<sub>2</sub></b>              | bdl       | bdl   | 0.23  | bdl       | bdl   | bdl   |
| <b>ZrO<sub>2</sub></b>             | 94.58     | 97.28 | 98.18 | 97.71     | 95.25 | 95.54 |
| <b>CaO</b>                         | bdl       | bdl   | bdl   | 0.02      | bdl   | 0.04  |
| <b>TiO<sub>2</sub></b>             | 0.35      | 0.36  | 0.18  | 0.37      | 0.31  | 0.52  |
| <b>ThO<sub>2</sub></b>             | bdl       | bdl   | bdl   | 0.06      | bdl   | bdl   |
| <b>HfO<sub>2</sub></b>             | 5.21      | 2.40  | 2.33  | 2.32      | 5.43  | 2.28  |
| <b>WO<sub>3</sub></b>              | bdl       | bdl   | bdl   | bdl       | bdl   | bdl   |
| <b>SiO<sub>2</sub></b>             | bdl       | bdl   | bdl   | bdl       | bdl   | bdl   |
| <b>MgO</b>                         | 0.02      | 0.02  | 0.03  | 0.03      | 0.03  | 0.02  |
| <b>Al<sub>2</sub>O<sub>3</sub></b> | bdl       | bdl   | bdl   | bdl       | bdl   | bdl   |
| <b>K<sub>2</sub>O</b>              | bdl       | bdl   | bdl   | bdl       | bdl   | bdl   |
| <b>Sc<sub>2</sub>O<sub>3</sub></b> | bdl       | bdl   | bdl   | bdl       | 0.02  | bdl   |
| <b>FeO</b>                         | bdl       | bdl   | bdl   | bdl       | bdl   | 0.05  |
| <b>MnO</b>                         | bdl       | bdl   | bdl   | bdl       | bdl   | bdl   |
| <b>Nb<sub>2</sub>O<sub>5</sub></b> | 0.13      | 0.22  | 0.17  | 0.13      | 0.15  | 0.09  |
| <b>La<sub>2</sub>O<sub>3</sub></b> | bdl       | bdl   | bdl   | bdl       | bdl   | bdl   |
| <b>Ce<sub>2</sub>O<sub>3</sub></b> | bdl       | bdl   | bdl   | bdl       | bdl   | bdl   |
| <b>Pr<sub>2</sub>O<sub>3</sub></b> | bdl       | bdl   | bdl   | bdl       | bdl   | bdl   |
| <b>Nd<sub>2</sub>O<sub>3</sub></b> | bdl       | bdl   | bdl   | bdl       | bdl   | bdl   |
| <b>Sm<sub>2</sub>O<sub>3</sub></b> | bdl       | bdl   | bdl   | bdl       | bdl   | bdl   |
| <b>Eu<sub>2</sub>O<sub>3</sub></b> | bdl       | bdl   | bdl   | bdl       | bdl   | bdl   |
| <b>Gd<sub>2</sub>O<sub>3</sub></b> | bdl       | bdl   | bdl   | bdl       | bdl   | bdl   |
| <b>Dy<sub>2</sub>O<sub>3</sub></b> | bdl       | bdl   | bdl   | bdl       | bdl   | bdl   |
| <b>Er<sub>2</sub>O<sub>3</sub></b> | bdl       | bdl   | bdl   | bdl       | bdl   | bdl   |
| <b>Yb<sub>2</sub>O<sub>3</sub></b> | bdl       | bdl   | bdl   | bdl       | bdl   | bdl   |
| <b>Y<sub>2</sub>O<sub>3</sub></b>  | bdl       | bdl   | bdl   | bdl       | bdl   | bdl   |
| <b>Total</b>                       | 100.3     | 100.3 | 101.1 | 100.6     | 101.2 | 98.5  |

### *Rutile composition*

| Sample                         | 13MDL76-A |       |       | 13MDL76-B |       |       |
|--------------------------------|-----------|-------|-------|-----------|-------|-------|
|                                |           |       |       |           |       |       |
| UO <sub>2</sub>                | bdl       | bdl   | bdl   | bdl       | bdl   | bdl   |
| ZrO <sub>2</sub>               | 0.29      | 0.03  | 0.15  | 0.03      | 0.59  | 0.21  |
| CaO                            | 0.07      | 0.82  | 0.52  | 1.10      | 0.19  | 0.74  |
| TiO <sub>2</sub>               | 98.70     | 98.09 | 97.67 | 98.90     | 97.03 | 97.66 |
| ThO <sub>2</sub>               | bdl       | bdl   | bdl   | bdl       | bdl   | bdl   |
| HfO <sub>2</sub>               | 0.08      | bdl   | 0.07  | 0.05      | 0.08  | 0.03  |
| WO <sub>3</sub>                | bdl       | 0.15  | 0.16  | bdl       | 0.17  | bdl   |
| SiO <sub>2</sub>               | 0.06      | 0.08  | bdl   | 0.03      | 0.04  | 0.05  |
| MgO                            | 0.06      | 0.07  | 0.02  | 0.03      | 0.03  | bdl   |
| Al <sub>2</sub> O <sub>3</sub> | 0.03      | 0.04  | 0.01  | 0.04      | 0.11  | 0.07  |
| K <sub>2</sub> O               | 0.17      | 0.11  | 0.01  | 0.09      | 0.09  | 0.02  |
| Sc <sub>2</sub> O <sub>3</sub> | bdl       | bdl   | bdl   | bdl       | bdl   | bdl   |
| FeO                            | 0.02      | 0.05  | 0.09  | 0.03      | 0.09  | 0.07  |
| MnO                            | bdl       | bdl   | bdl   | bdl       | bdl   | bdl   |
| Nb <sub>2</sub> O <sub>5</sub> | 0.10      | 0.08  | 0.06  | bdl       | 0.54  | 0.30  |
| La <sub>2</sub> O <sub>3</sub> | bdl       | bdl   | bdl   | bdl       | bdl   | bdl   |
| Ce <sub>2</sub> O <sub>3</sub> | bdl       | bdl   | bdl   | bdl       | bdl   | bdl   |
| Pr <sub>2</sub> O <sub>3</sub> | bdl       | bdl   | bdl   | bdl       | bdl   | bdl   |
| Nd <sub>2</sub> O <sub>3</sub> | bdl       | bdl   | bdl   | bdl       | bdl   | bdl   |
| Sm <sub>2</sub> O <sub>3</sub> | bdl       | bdl   | bdl   | bdl       | bdl   | bdl   |
| Eu <sub>2</sub> O <sub>3</sub> | bdl       | bdl   | bdl   | bdl       | bdl   | bdl   |
| Gd <sub>2</sub> O <sub>3</sub> | bdl       | bdl   | bdl   | bdl       | bdl   | bdl   |
| Dy <sub>2</sub> O <sub>3</sub> | bdl       | bdl   | bdl   | bdl       | bdl   | bdl   |
| Er <sub>2</sub> O <sub>3</sub> | bdl       | bdl   | bdl   | bdl       | bdl   | bdl   |
| Yb <sub>2</sub> O <sub>3</sub> | bdl       | bdl   | bdl   | bdl       | bdl   | bdl   |
| Y <sub>2</sub> O <sub>3</sub>  | bdl       | bdl   | bdl   | bdl       | bdl   | bdl   |
| <b>Total</b>                   | 99.6      | 99.5  | 98.8  | 100.3     | 99.0  | 99.2  |

### *Geikielite composition*

| <b>Sample</b>                      | <b>13MDL76-A</b> |       |       | <b>13MDL76-B</b> |       |       |
|------------------------------------|------------------|-------|-------|------------------|-------|-------|
|                                    |                  |       |       |                  |       |       |
| <b>UO<sub>2</sub></b>              | bdl              | bdl   | bdl   | bdl              | bdl   | bdl   |
| <b>ZrO<sub>2</sub></b>             | bdl              | bdl   | 0.04  | bdl              | bdl   | bdl   |
| <b>CaO</b>                         | 0.01             | 0.10  | 0.11  | 0.01             | 0.11  | 0.03  |
| <b>TiO<sub>2</sub></b>             | 65.54            | 63.32 | 64.92 | 64.68            | 64.06 | 64.65 |
| <b>ThO<sub>2</sub></b>             | bdl              | bdl   | bdl   | bdl              | bdl   | bdl   |
| <b>HfO<sub>2</sub></b>             | bdl              | bdl   | bdl   | bdl              | bdl   | 0.05  |
| <b>WO<sub>3</sub></b>              | bdl              | bdl   | bdl   | bdl              | bdl   | bdl   |
| <b>SiO<sub>2</sub></b>             | bdl              | bdl   | bdl   | bdl              | 0.03  | bdl   |
| <b>MgO</b>                         | 27.43            | 28.79 | 30.00 | 28.72            | 28.60 | 29.84 |
| <b>Al<sub>2</sub>O<sub>3</sub></b> | 0.02             | bdl   | bdl   | 0.02             | bdl   | bdl   |
| <b>K<sub>2</sub>O</b>              | bdl              | bdl   | bdl   | bdl              | bdl   | bdl   |
| <b>Sc<sub>2</sub>O<sub>3</sub></b> | bdl              | bdl   | bdl   | bdl              | bdl   | 0.01  |
| <b>FeO</b>                         | 7.02             | 7.00  | 5.31  | 5.42             | 5.31  | 5.23  |
| <b>MnO</b>                         | 0.04             | 0.06  | 0.05  | 0.06             | 0.02  | 0.03  |
| <b>Nb<sub>2</sub>O<sub>5</sub></b> | bdl              | bdl   | bdl   | bdl              | bdl   | bdl   |
| <b>La<sub>2</sub>O<sub>3</sub></b> | bdl              | bdl   | bdl   | bdl              | bdl   | bdl   |
| <b>Ce<sub>2</sub>O<sub>3</sub></b> | bdl              | bdl   | bdl   | bdl              | bdl   | bdl   |
| <b>Pr<sub>2</sub>O<sub>3</sub></b> | bdl              | bdl   | bdl   | bdl              | bdl   | bdl   |
| <b>Nd<sub>2</sub>O<sub>3</sub></b> | bdl              | bdl   | bdl   | bdl              | bdl   | bdl   |
| <b>Sm<sub>2</sub>O<sub>3</sub></b> | bdl              | bdl   | bdl   | bdl              | bdl   | bdl   |
| <b>Eu<sub>2</sub>O<sub>3</sub></b> | bdl              | bdl   | bdl   | bdl              | bdl   | bdl   |
| <b>Gd<sub>2</sub>O<sub>3</sub></b> | bdl              | bdl   | bdl   | bdl              | bdl   | bdl   |
| <b>Dy<sub>2</sub>O<sub>3</sub></b> | bdl              | bdl   | bdl   | bdl              | bdl   | bdl   |
| <b>Er<sub>2</sub>O<sub>3</sub></b> | bdl              | bdl   | bdl   | bdl              | bdl   | bdl   |
| <b>Yb<sub>2</sub>O<sub>3</sub></b> | bdl              | bdl   | bdl   | bdl              | bdl   | bdl   |
| <b>Y<sub>2</sub>O<sub>3</sub></b>  | bdl              | bdl   | bdl   | bdl              | bdl   | bdl   |
| <b>Total</b>                       | 100.2            | 99.5  | 100.6 | 99.2             | 98.4  | 100.1 |

### *Spinel composition*

| Sample                             | 13MDL76-A |       |       |       | 13MDL76-B |        |       |       |
|------------------------------------|-----------|-------|-------|-------|-----------|--------|-------|-------|
|                                    | Core      |       | Rim   |       | Core      |        | Rim   |       |
| <b>Texture</b>                     |           |       |       |       |           |        |       |       |
| <b>SiO<sub>2</sub></b>             | bdl       | bdl   | bdl   | bdl   | bdl       | bdl    | 0.03  | bdl   |
| <b>TiO<sub>2</sub></b>             | 0.24      | 0.27  | 0.15  | 0.08  | 0.24      | 0.25   | 0.10  | 0.11  |
| <b>Al<sub>2</sub>O<sub>3</sub></b> | 68.80     | 68.53 | 69.09 | 69.07 | 68.02     | 68.22  | 69.73 | 70.10 |
| <b>Cr<sub>2</sub>O<sub>3</sub></b> | 2.41      | 2.34  | 1.03  | 1.02  | 3.23      | 3.25   | 1.44  | 0.80  |
| <b>FeO</b>                         | 1.34      | 1.25  | 1.17  | 1.14  | 1.21      | 1.28   | 1.12  | 1.15  |
| <b>MnO</b>                         | 0.01      | 0.00  | bdl   | 0.02  | 0.02      | bdl    | 0.01  | bdl   |
| <b>MgO</b>                         | 27.48     | 27.32 | 27.58 | 26.84 | 27.43     | 27.52  | 27.32 | 27.29 |
| <b>CaO</b>                         | bdl       | bdl   | 0.05  | 0.39  | 0.02      | 0.02   | 0.18  | 0.06  |
| <b>Na<sub>2</sub>O</b>             | bdl       | 0.01  | bdl   | bdl   | 0.01      | 0.01   | bdl   | 0.02  |
| <b>K<sub>2</sub>O</b>              | bdl       | bdl   | bdl   | 0.01  | bdl       | bdl    | 0.01  | bdl   |
| <b>NiO</b>                         | bdl       | 0.02  | 0.01  | 0.01  | bdl       | bdl    | bdl   | 0.01  |
| <b>Total</b>                       | 100.29    | 99.75 | 99.08 | 98.58 | 100.21    | 100.54 | 99.92 | 99.54 |
| <b>Si</b>                          | 0.000     | 0.000 | 0.000 | 0.000 | 0.001     | 0.000  | 0.001 | 0.000 |
| <b>Ti</b>                          | 0.004     | 0.005 | 0.003 | 0.001 | 0.004     | 0.004  | 0.002 | 0.002 |
| <b>Al</b>                          | 1.942     | 1.944 | 1.962 | 1.974 | 1.926     | 1.925  | 1.968 | 1.981 |
| <b>Cr</b>                          | 0.046     | 0.045 | 0.020 | 0.020 | 0.061     | 0.062  | 0.027 | 0.015 |
| <b>Fe<sup>3+</sup></b>             | 0.004     | 0.002 | 0.013 | 0.004 | 0.003     | 0.005  | 0.000 | 0.000 |
| <b>Fe<sup>2+</sup></b>             | 0.023     | 0.023 | 0.011 | 0.019 | 0.022     | 0.021  | 0.022 | 0.023 |
| <b>Mn</b>                          | 0.000     | 0.000 | 0.000 | 0.000 | 0.00      | 0.00   | 0.000 | 0.000 |
| <b>Mg</b>                          | 0.981     | 0.980 | 0.990 | 0.970 | 0.982     | 0.982  | 0.975 | 0.976 |
| <b>Ca</b>                          | 0.000     | 0.000 | 0.001 | 0.010 | 0.001     | 0.00   | 0.005 | 0.002 |
| <b>Na</b>                          | 0.000     | 0.001 | 0.000 | 0.000 | 0.00      | 0.001  | 0.000 | 0.001 |
| <b>K</b>                           | 0.000     | 0.000 | 0.000 | 0.000 | 0.000     | 0.000  | 0.000 | 0.000 |
| <b>Ni</b>                          | 0.000     | 0.000 | 0.000 | 0.000 | 0.000     | 0.000  | 0.000 | 0.000 |
| <b>Total</b>                       | 3         | 3     | 3     | 3     | 3         | 3      | 3     | 3     |
| <b>Mg<sup>#</sup></b>              | 0.977     | 0.977 | 0.989 | 0.981 | 0.978     | 0.979  | 0.978 | 0.977 |

**Mg<sup>#</sup>** = Mg/(Mg+Fe<sup>2+</sup>)



### *Forsterite composition*

| <b>Sample</b>                      | <b>13MDL76-A</b> |        | <b>13MDL76-B</b> |        |
|------------------------------------|------------------|--------|------------------|--------|
| <b>SiO<sub>2</sub></b>             | 42.96            | 43.13  | 42.76            | 42.98  |
| <b>TiO<sub>2</sub></b>             | 0.02             | bdl    | 0.03             | bdl    |
| <b>Al<sub>2</sub>O<sub>3</sub></b> | bdl              | bdl    | bdl              | bdl    |
| <b>Cr<sub>2</sub>O<sub>3</sub></b> | 0.03             | 0.02   | bdl              | bdl    |
| <b>FeO</b>                         | 0.43             | 0.93   | 0.90             | 0.89   |
| <b>MnO</b>                         | 0.01             | 0.01   | 0.01             | bdl    |
| <b>MgO</b>                         | 57.29            | 56.61  | 56.94            | 57.22  |
| <b>CaO</b>                         | 0.02             | 0.10   | 0.08             | 0.06   |
| <b>Na<sub>2</sub>O</b>             | 0.01             | bdl    | 0.01             | bdl    |
| <b>K<sub>2</sub>O</b>              | bdl              | 0.02   | 0.01             | 0.01   |
| <b>NiO</b>                         | 0.04             | 0.01   | 0.01             | bdl    |
| <b>Total</b>                       | 100.80           | 100.82 | 100.76           | 101.17 |
| <b>Si</b>                          | 1.000            | 1.005  | 0.998            | 0.999  |
| <b>Ti</b>                          | 0.000            | 0.000  | 0.001            | 0.000  |
| <b>Al</b>                          | 0.000            | 0.000  | 0.000            | 0.000  |
| <b>Cr</b>                          | 0.001            | 0.000  | 0.000            | 0.000  |
| <b>Fe<sup>2+</sup></b>             | 0.008            | 0.018  | 0.018            | 0.017  |
| <b>Mn</b>                          | 0.000            | 0.000  | 0.000            | 0.000  |
| <b>Mg</b>                          | 1.988            | 1.967  | 1.982            | 1.983  |
| <b>Ca</b>                          | 0.000            | 0.002  | 0.002            | 0.002  |
| <b>Na</b>                          | 0.000            | 0.000  | 0.000            | 0.000  |
| <b>K</b>                           | 0.000            | 0.001  | 0.000            | 0.000  |
| <b>Ni</b>                          | 0.001            | 0.000  | 0.000            | 0.000  |
| <b>Total</b>                       | 2.999            | 2.995  | 3.001            | 3.001  |
| <b>Mg#</b>                         | 0.996            | 0.991  | 0.991            | 0.992  |

*Phlogopite composition*

| Sample                             | 13MDL76-A |       |       |       | 13MDL76-B |       |       |       |
|------------------------------------|-----------|-------|-------|-------|-----------|-------|-------|-------|
|                                    | Core      |       | Rim   |       | Core      |       | Rim   |       |
| <b>Texture</b>                     |           |       |       |       |           |       |       |       |
| <b>SiO<sub>2</sub></b>             | 41.34     | 41.38 | 40.39 | 40.95 | 41.20     | 41.31 | 40.44 | 40.68 |
| <b>TiO<sub>2</sub></b>             | 1.44      | 1.21  | 1.54  | 1.32  | 1.18      | 1.15  | 0.61  | 0.57  |
| <b>Al<sub>2</sub>O<sub>3</sub></b> | 15.73     | 15.91 | 16.14 | 16.11 | 15.79     | 16.01 | 16.23 | 16.35 |
| <b>Cr<sub>2</sub>O<sub>3</sub></b> | 0.05      | 0.04  | 0.01  | 0.04  | 0.03      | 0.02  | 0.01  | 0.01  |
| <b>FeO</b>                         | 0.23      | 0.20  | 0.28  | 0.18  | 0.24      | 0.23  | 0.14  | 0.11  |
| <b>MnO</b>                         | 0.02      | 0.01  | 0.02  | 0.01  | bdl       | 0.02  | 0.01  | 0.01  |
| <b>MgO</b>                         | 27.03     | 27.15 | 26.95 | 27.60 | 26.53     | 26.73 | 26.89 | 26.84 |
| <b>CaO</b>                         | 0.01      | 0.01  | 0.03  | 0.03  | 0.01      | 0.01  | 0.02  | 0.03  |
| <b>Na<sub>2</sub>O</b>             | 2.29      | 2.23  | 2.35  | 2.82  | 2.17      | 1.89  | 0.78  | 0.73  |
| <b>K<sub>2</sub>O</b>              | 7.25      | 7.17  | 7.24  | 6.15  | 7.83      | 7.90  | 9.81  | 9.83  |
| <b>NiO</b>                         | bdl       | bdl   | bdl   | bdl   | bdl       | 0.01  | 0.03  | 0.01  |
| <b>F</b>                           | 1.79      | 1.77  | 1.59  | 1.88  | 1.57      | 1.66  | 1.74  | 1.88  |
| <b>Cl</b>                          | 0.01      | 0.02  | 0.02  | 0.02  | 0.03      | 0.02  | 0.01  | 0.02  |
| <b>Total</b>                       | 97.18     | 97.09 | 96.54 | 97.08 | 96.55     | 96.93 | 96.71 | 97.06 |
| <b>Si</b>                          | 2.841     | 2.842 | 2.794 | 2.808 | 2.851     | 2.847 | 2.820 | 2.827 |
| <b>Ti</b>                          | 0.074     | 0.063 | 0.080 | 0.068 | 0.061     | 0.060 | 0.032 | 0.030 |
| <b>Al<sup>IV</sup></b>             | 1.159     | 1.158 | 1.206 | 1.192 | 1.149     | 1.153 | 1.180 | 1.173 |
| <b>Al<sup>VI</sup></b>             | 0.115     | 0.130 | 0.110 | 0.110 | 0.138     | 0.147 | 0.153 | 0.167 |
| <b>Cr</b>                          | 0.003     | 0.002 | 0.001 | 0.002 | 0.002     | 0.001 | 0.001 | 0.001 |
| <b>Fe</b>                          | 0.013     | 0.011 | 0.016 | 0.010 | 0.014     | 0.013 | 0.008 | 0.006 |
| <b>Mn</b>                          | 0.001     | 0.001 | 0.001 | 0.000 | 0.000     | 0.001 | 0.001 | 0.001 |
| <b>Mg</b>                          | 2.769     | 2.780 | 2.780 | 2.821 | 2.736     | 2.746 | 2.795 | 2.781 |
| <b>Ca</b>                          | 0.001     | 0.001 | 0.002 | 0.002 | 0.001     | 0.000 | 0.001 | 0.002 |
| <b>Na</b>                          | 0.305     | 0.297 | 0.315 | 0.375 | 0.291     | 0.253 | 0.105 | 0.098 |
| <b>K</b>                           | 0.636     | 0.628 | 0.639 | 0.538 | 0.691     | 0.695 | 0.873 | 0.872 |
| <b>Ni</b>                          | 0.000     | 0.000 | 0.000 | 0.000 | 0.000     | 0.000 | 0.000 | 0.000 |
| <b>Mg#</b>                         | 0.995     | 0.996 | 0.994 | 0.996 | 0.995     | 0.995 | 0.997 | 0.998 |

bdl: below detection limits.

**Table S2. U-Pb data for different types of zirconolite from the MMB.**

| Samples                             | Pb   | Th    | U      | Th/U | $^{238}\text{U}/^{206}\text{Pb}$ | 1 $\sigma$ | $^{207}\text{Pb}/^{206}\text{Pb}$ | 1 $\sigma$ | $f_{206}$ | $^{207}\text{Pb}$ -corrected date |            |
|-------------------------------------|------|-------|--------|------|----------------------------------|------------|-----------------------------------|------------|-----------|-----------------------------------|------------|
|                                     |      |       |        |      |                                  |            |                                   |            |           | $^{206}\text{Pb}/^{238}\text{U}$  | 1 $\sigma$ |
| <b>Zirconolite-I from 13MDL76-A</b> |      |       |        |      |                                  |            |                                   |            |           |                                   |            |
| 13MDL76-A-Zr-I-1                    | 1499 | 12673 | 231568 | 0.05 | 169                              | 4.9        | 0.0550                            | 0.0017     | 0.010     | 37.5                              | 1.1        |
| 13MDL76-A-Zr-I-2                    | 947  | 17309 | 231483 | 0.07 | 184                              | 5.1        | 0.0598                            | 0.0010     | 0.016     | 34.3                              | 0.9        |
| 13MDL76-A-Zr-I-3                    | 1125 | 17693 | 271355 | 0.07 | 186                              | 4.8        | 0.0592                            | 0.0010     | 0.016     | 34.0                              | 0.9        |
| 13MDL76-A-Zr-I-4                    | 1127 | 8705  | 203995 | 0.04 | 176                              | 5.0        | 0.0619                            | 0.0016     | 0.019     | 35.7                              | 1.0        |
| 13MDL76-A-Zr-I-5                    | 1214 | 8566  | 203147 | 0.04 | 179                              | 5.1        | 0.0601                            | 0.0018     | 0.017     | 35.4                              | 1.0        |
| 13MDL76-A-Zr-I-6                    | 1198 | 11006 | 219229 | 0.05 | 178                              | 4.8        | 0.0602                            | 0.0011     | 0.017     | 35.5                              | 0.9        |
| 13MDL76-A-Zr-I-7                    | 1201 | 11972 | 225215 | 0.05 | 181                              | 4.9        | 0.0592                            | 0.0011     | 0.016     | 35.0                              | 0.9        |
| 13MDL76-A-Zr-I-8                    | 788  | 6514  | 175695 | 0.04 | 176                              | 6.2        | 0.0533                            | 0.0018     | 0.008     | 36.1                              | 1.3        |
| 13MDL76-A-Zr-I-9                    | 913  | 10167 | 179629 | 0.06 | 172                              | 6.2        | 0.0536                            | 0.0021     | 0.009     | 37.2                              | 1.3        |
| 13MDL76-A-Zr-I-10                   | 981  | 8126  | 176706 | 0.05 | 169                              | 5.7        | 0.0563                            | 0.0021     | 0.012     | 37.7                              | 1.3        |
| 13MDL76-A-Zr-I-11                   | 1107 | 9875  | 212117 | 0.05 | 180                              | 5.5        | 0.0570                            | 0.0011     | 0.013     | 35.3                              | 1.1        |
| 13MDL76-A-Zr-I-12                   | 1266 | 11717 | 229719 | 0.05 | 186                              | 5.9        | 0.0544                            | 0.0015     | 0.010     | 34.3                              | 1.1        |
| 13MDL76-A-Zr-I-13                   | 1179 | 12649 | 248471 | 0.05 | 190                              | 5.8        | 0.0562                            | 0.0014     | 0.012     | 33.5                              | 1.0        |
| 13MDL76-A-Zr-I-14                   | 1210 | 14477 | 243349 | 0.06 | 185                              | 5.8        | 0.0560                            | 0.0014     | 0.012     | 34.3                              | 1.1        |
| 13MDL76-A-Zr-I-15                   | 1063 | 17580 | 224662 | 0.08 | 185                              | 5.8        | 0.0560                            | 0.0017     | 0.012     | 34.4                              | 1.1        |
| 13MDL76-A-Zr-I-16                   | 1129 | 19205 | 263716 | 0.07 | 189                              | 5.7        | 0.0581                            | 0.0014     | 0.014     | 33.5                              | 1.0        |
| 13MDL76-A-Zr-I-17                   | 1156 | 17592 | 285222 | 0.06 | 190                              | 5.4        | 0.0566                            | 0.0011     | 0.013     | 33.3                              | 1.0        |
| 13MDL76-A-Zr-I-18                   | 1024 | 17791 | 263610 | 0.07 | 190                              | 5.4        | 0.0567                            | 0.0011     | 0.013     | 33.3                              | 1.0        |
| <b>Zirconolite-I from 13MDL76-B</b> |      |       |        |      |                                  |            |                                   |            |           |                                   |            |
| 13MDL76-B-Zr-I-1                    | 1121 | 12583 | 246457 | 0.05 | 186                              | 5.2        | 0.0586                            | 0.0012     | 0.015     | 34.1                              | 1.0        |
| 13MDL76-B-Zr-I-2                    | 1037 | 14791 | 232460 | 0.06 | 191                              | 5.5        | 0.0572                            | 0.0011     | 0.013     | 33.2                              | 1.0        |
| 13MDL76-B-Zr-I-3                    | 1095 | 15920 | 241874 | 0.07 | 183                              | 5.4        | 0.0573                            | 0.0012     | 0.013     | 34.6                              | 1.0        |
| 13MDL76-B-Zr-I-4                    | 1204 | 13436 | 260313 | 0.05 | 184                              | 5.4        | 0.0564                            | 0.0013     | 0.012     | 34.5                              | 1.0        |
| 13MDL76-B-Zr-I-5                    | 1022 | 15382 | 238978 | 0.06 | 178                              | 5.1        | 0.0583                            | 0.0012     | 0.015     | 35.5                              | 1.0        |
| 13MDL76-B-Zr-I-6                    | 1080 | 18318 | 239078 | 0.08 | 186                              | 5.2        | 0.0564                            | 0.0012     | 0.012     | 34.1                              | 1.0        |
| 13MDL76-B-Zr-I-7                    | 1154 | 7263  | 207805 | 0.03 | 168                              | 5.9        | 0.0565                            | 0.0021     | 0.012     | 37.9                              | 1.3        |

|                    |      |       |        |      |     |     |        |        |       |      |     |     |
|--------------------|------|-------|--------|------|-----|-----|--------|--------|-------|------|-----|-----|
| 13MDL76-B-ZrI-I-8  | 1080 | 7853  | 186290 | 0.04 | 168 | 6.5 | 0.0546 | 0.0029 | 0.010 | 37.9 | 1.5 | 3.9 |
| 13MDL76-B-ZrI-I-9  | 1206 | 7488  | 202458 | 0.04 | 169 | 6.0 | 0.0562 | 0.0025 | 0.012 | 37.6 | 1.3 | 3.6 |
| 13MDL76-B-ZrI-I-10 | 1355 | 10958 | 224193 | 0.05 | 171 | 5.6 | 0.0575 | 0.0017 | 0.014 | 37.0 | 1.2 | 3.3 |
| 13MDL76-B-ZrI-I-11 | 1233 | 6971  | 204623 | 0.03 | 167 | 5.6 | 0.0583 | 0.0020 | 0.015 | 37.9 | 1.3 | 3.4 |
| 13MDL76-B-ZrI-I-12 | 1195 | 12920 | 232836 | 0.06 | 189 | 6.1 | 0.0545 | 0.0012 | 0.010 | 33.7 | 1.1 | 3.2 |
| 13MDL76-B-ZrI-I-13 | 1220 | 9886  | 223721 | 0.04 | 181 | 5.9 | 0.0553 | 0.0017 | 0.011 | 35.2 | 1.1 | 3.3 |
| 13MDL76-B-ZrI-I-14 | 1507 | 12839 | 250330 | 0.05 | 183 | 5.0 | 0.0570 | 0.0013 | 0.013 | 34.7 | 1.0 | 2.7 |
| 13MDL76-B-ZrI-I-15 | 1063 | 8878  | 177873 | 0.05 | 176 | 5.0 | 0.0563 | 0.0013 | 0.012 | 36.0 | 1.0 | 2.8 |
| 13MDL76-B-ZrI-I-16 | 1120 | 7314  | 208529 | 0.04 | 182 | 5.0 | 0.0569 | 0.0013 | 0.013 | 34.9 | 1.0 | 2.7 |

### Zirconlite-II from 13MDL76-A

|                       |      |       |        |      |     |     |        |        |       |      |     |     |
|-----------------------|------|-------|--------|------|-----|-----|--------|--------|-------|------|-----|-----|
| 13MDL76-A-ZrI II-1(C) | 1043 | 17637 | 234080 | 0.08 | 186 | 5.5 | 0.0570 | 0.0011 | 0.013 | 34.1 | 1.0 | 3.0 |
| 13MDL76-A-ZrI II-2(C) | 1202 | 15225 | 279749 | 0.05 | 182 | 5.3 | 0.0575 | 0.0010 | 0.014 | 34.9 | 1.0 | 2.9 |
| 13MDL76-A-ZrI II-3(R) | 1169 | 13948 | 270951 | 0.05 | 184 | 5.4 | 0.0582 | 0.0010 | 0.015 | 34.4 | 1.0 | 2.9 |
| 13MDL76-A-ZrI II-4(R) | 1104 | 16515 | 250711 | 0.07 | 186 | 5.5 | 0.0568 | 0.0010 | 0.013 | 34.1 | 1.0 | 3.0 |

### Zirconlite-II from 13MDL76-B

|                       |      |       |        |      |     |     |        |        |       |      |     |     |
|-----------------------|------|-------|--------|------|-----|-----|--------|--------|-------|------|-----|-----|
| 13MDL76-B-ZrI II-1(R) | 1237 | 9106  | 206245 | 0.04 | 189 | 6.4 | 0.0537 | 0.0016 | 0.009 | 33.7 | 1.2 | 3.4 |
| 13MDL76-B-ZrI II-2(R) | 747  | 7202  | 171728 | 0.04 | 181 | 4.9 | 0.0581 | 0.0011 | 0.014 | 35.0 | 1.0 | 2.7 |
| 13MDL76-B-ZrI II-3(C) | 1035 | 8338  | 205570 | 0.04 | 182 | 5.0 | 0.0593 | 0.0011 | 0.016 | 34.7 | 0.9 | 2.7 |
| 13MDL76-B-ZrI II-4(R) | 1183 | 19046 | 236005 | 0.08 | 188 | 6.0 | 0.0581 | 0.0016 | 0.014 | 33.8 | 1.1 | 3.2 |
| 13MDL76-B-ZrI II-5(C) | 1321 | 7821  | 217256 | 0.04 | 171 | 5.0 | 0.0565 | 0.0015 | 0.012 | 37.1 | 1.1 | 2.9 |
| 13MDL76-B-ZrI II-6(C) | 1154 | 15122 | 240847 | 0.06 | 178 | 5.1 | 0.0568 | 0.0014 | 0.013 | 35.6 | 1.0 | 2.9 |
| 13MDL76-B-ZrI II-7(C) | 1106 | 8616  | 215264 | 0.04 | 185 | 5.8 | 0.0579 | 0.0019 | 0.014 | 34.3 | 1.1 | 3.1 |

### Zirconlite-III from 13MDL76-B

|                     |     |        |       |      |     |      |        |        |       |      |     |      |
|---------------------|-----|--------|-------|------|-----|------|--------|--------|-------|------|-----|------|
| 13MDL76-B-ZrI III-1 | 31  | 9715   | 8837  | 1.10 | 366 | 32.2 | 0.1023 | 0.0180 | 0.071 | 16.3 | 1.5 | 9.1  |
| 13MDL76-B-ZrI III-2 | 33  | 8735   | 8996  | 0.97 | 340 | 22.0 | 0.0924 | 0.0131 | 0.058 | 17.8 | 1.2 | 6.7  |
| 13MDL76-B-ZrI III-3 | 356 | 122130 | 42621 | 2.87 | 328 | 33.3 | 0.0728 | 0.0180 | 0.033 | 19.0 | 2.0 | 10.4 |
| 13MDL76-B-ZrI III-4 | 38  | 23772  | 8135  | 2.92 | 327 | 21.4 | 0.0961 | 0.0121 | 0.063 | 18.5 | 1.2 | 6.7  |
| 13MDL76-B-ZrI III-5 | 105 | 15323  | 35237 | 0.43 | 334 | 13.4 | 0.0649 | 0.0050 | 0.023 | 18.8 | 0.8 | 4.1  |
| 13MDL76-B-ZrI III-6 | 148 | 18021  | 44590 | 0.40 | 312 | 15.5 | 0.0743 | 0.0078 | 0.035 | 19.9 | 1.0 | 5.1  |

C:core; R: rim.
